# Supplementary material
Source: Springer Nature journal article supplement (https://www.springermedizin.de/resource/supplementary/12872_2007_21_MOESM1_ESM.pdf/9431146)
Supplement: MOESM1 [file 9431146]

**Consecutive patients with first proximal DVT assessed for eligibility**

1. Contraindication to compression stockings
2. Inability to apply stockings daily

**Excluded if**

3. Limited lifespan
4. Geographic inaccessibility
5. Treatment of acute DVT with thrombolytic agents

**Eligible and consenting patients**

**R**

Active Stocking  
for 2 years

Inactive Stocking  
for 2 years

Primary outcome  
**PTS incidence**

Secondary Outcomes  
**PTS severity, reflux**  
**VTE recurrence, VTE death**  
**Major Bleeding**  
**Markers of inflammation, thrombophilia, d-dimer**  
**QOL**  
**Cost-effectiveness**
